# Supplementary material
Source: PubMed Central journal article supplement (PMC534712)
Supplement: pnas_101_48_16819__2.pdf [file pnas_101_48_16819__2.pdf]

### **Data Set 3. Molecular sequence data**

Locality data and GenBank accession numbers for the new taxa included in our analyses are below. We also include GenBank accession numbers for taxa published elsewhere, but used in our analyses.

#### **Institutional and Field-Series Acronyms**

**CM:** Carnegie Museum of Natural History, Pittsburgh

**FL:** Fernando Lobo, field series (currently under study; will be deposited at FML or MCN)

**FML:** Fundación Miguel Lillo, Tucumán, Argentina

**MCN:** Museo de Ciencias Naturales, Universidad Nacional de Salta, Argentina

**MIC:** Miguel I. Christie, private collection

**MLP.S:** Museo de la Plata, Buenos Aires, Argentina

**MVZ:** Museum of Vertebrate Zoology, University of California, Berkeley

**REE:** Robert E. Espinoza, field series (currently under study; will be deposited at FML or MCN)

**SDSU:** San Diego State University, San Diego

#### **ND2 Sequences**

*Liolaemus archeforus* (MCN 1543; GenBank Accession: **AY661901**); ARGENTINA:

Province Santa Cruz: Department Lago Buenos Aires: 12 km from Perito Moreno  
(46° 30.402' S; 71° 00.423' W)

***Liolaemus baguali*** (MCN 764; GenBank Accession: **AY661905**); ARGENTINA:

Province Santa Cruz: Department Lago Argentino: 40 km S Lago Cardiel (49° 11.096' S; 71° 20.746' W)

***Liolaemus canqueli*** (FML 13966; GenBank Accession: **AY661896**); ARGENTINA:

Province Chubut: Department Paso de Indios: W-facing slope Meseta El Sombrero, 1.2 km N intersection between Ruta Provincial 53 and Ruta Provincial 90 at km marker 1778 (44° 09.302' S; 68° 16.202' W; 528 m)

***Liolaemus donosobarrosi*** (FML 10059; GenBank Accession: **AY661899**);

ARGENTINA: Province Neuquén: Department Confluencia: 7.4 km WNW Cutral-Có, on road to Paso de los Indios off Ruta Provincial 22 (38° 51.993' S; 69° 14.347' W; 626 m)

***Liolaemus elongatus*** [sample 10] (REE 833; GenBank Accession: **AY661898**);

ARGENTINA: Province Chubut: Department Sarmiento: Las Pulgas, 50 km W Lago Musters, Ruta Provincial 20 (45° 27.439' S; 69° 40.988' W; 535 m)

***Liolaemus gallardoi*** (MCN 1498; GenBank Accession: **AY661902**); ARGENTINA:

Province Santa Cruz: Department Rio Chico: Pampa del Asador, Lago Guitarra (47° 58.367' S; 71° 29.870' W)

***Liolaemus hatcheri*** (MCN 887; GenBank Accession: **AY661904**); ARGENTINA:

Province Santa Cruz: Meseta La Siberia, road to Estancia “San Adolfo” (49° 09.863' S; 71° 47.698' W; 1062 m)

***Liolaemus kriegi*** (REE 699; GenBank Accession: **AY661908**); ARGENTINA: Province

Neuquén: Department Zapala: 7.3 km NE Parque Nacional Laguna Blanca, Ruta Provincial 46 (39° 02.377' S; 70° 13.923' W; 1222 m)

***Liolaemus cf. melanops*** (REE 770; GenBank Accession: **AY661895**); ARGENTINA:

Province Rio Negro: Department 25 de Mayo: 9.1 km E Maquinchao, km marker 330 on Ruta Provincial 23 (41° 20.022' S; 69° 28.233' W; 898 m)

***Liolaemus sarmientoi*** (MCN 1511; GenBank Accession: **AY661907**); ARGENTINA:

Province Santa Cruz: Department Guer Aike; 5 km S Estancia Monte Aymond (52° 7.074' S; 69° 31.514' W)

***Liolaemus cf. silvanae*** (MCN 813; GenBank Accession: **AY661900**); ARGENTINA:

Province Santa Cruz: Department Lago Buenos Aires: 78 km S Los Antiguos on road to Co. Zeballos (47° 01.542' S; 71° 48.475' W; 1500 m)

***Liolaemus tari*** (MCN 1493; GenBank Accession: **AY661906**); ARGENTINA: Province

Santa Cruz: Meseta La Siberia, road to Estancia “San Adolfo” (49° 09.864' S; 71° 47.698' W; 1062 m)

***Liolaemus cf. xanthoviridis*** (REE 870; GenBank Accession: **AY661897**);

ARGENTINA: Province Santa Cruz: km marker 2164 on Ruta Nacional 3, 42.7 km S Tres Cerros (48° 33.481' S; 67° 44.379' W; 142 m)

***Liolaemus zullyi*** (MCN 1540; GenBank Accession: **AY661903**); ARGENTINA:

Province Santa Cruz: Department Lago Buenos Aires: 37 km S de los Antiguos, road to Co. Zeballos (46° 46.237' S; 71° 45.200' W)

***Phymaturus antofagastensis*** (MCN 306; GenBank Accession: **AY661892**);

ARGENTINA: Province Catamarca: Department Antofagasta: Cuesta Calalaste, 30 km NW Antofagasta de la Sierra (25° 52.590' S; 67° 27.511' W; 3753 m)

***Phymaturus indistinctus*** (FML 10087; GenBank Accession: **AY661893**);

ARGENTINA: Province Chubut: Department Sarmiento: Las Pulgas, 50 km W

Lago Musters, Ruta Provincial 20 (45° 27.439' S; 69° 40.988' W; 535 m)

***Phymaturus patagonicus*** (FML 10061; GenBank Accession: **AY661894**);

ARGENTINA: Province Rio Negro: Department Pilcaniyeu: Cerro Alto, Ruta

Nacional 40 (40° 44.074' S; 70° 34.696' W; 1014 m)

## 12S Sequences

***Liolaemus austromendocinus*** (SDSU 3399; GenBank Accession: **AY662075**);

ARGENTINA: Province Mendoza: Department Malargüe: 47 km S Malargüe on

Ruta Nacional 40 (38° 46' 10.4" S; 69° 38' 46.8" W; 1920 m)

***Liolaemus bellii*** (SDSU 3718; GenBank Accession: **AY662069**); CHILE: Region

Santiago: near Farellones (32° 21.84' S; 70° 18.32' W; 2530 m)

***Liolaemus cf. bibronii*** (SDSU 3463; GenBank Accession: **AY662067**); ARGENTINA:

Province Mendoza: Department Las Heras: 24 km NE Uspallata (38° 28' 52.4" S;

69° 11' 11.9" W; 2768 m)

***Liolaemus bitaeniatus*** (SDSU 3569; GenBank Accession: **AY662062**); ARGENTINA:

Province Tucumán: Department Tafi del Valle: Dique de la Angostura, 10 km E

Tafi del Valle on Ruta Provincial 307 (26° 50' 0.89" S; 65° 40' 56.9" W; 1860 m)

***Liolaemus buergeri*** (FML 7195; GenBank Accession: **AY662072**); ARGENTINA:

Province Mendoza: Department Malargüe: Los Molles (35° 09' 24.0" S; 69° 56'

22.5" W; 1968 m)

***Liolaemus capillitas*** (SDSU 3481; GenBank Accession: **AY662063**); ARGENTINA:

Province Catamarca: Department Andalgalá: 22 km S Mina Capillitas on Ruta

Provincial 47 (27° 26' 51.6" S; 66° 24' 40.5" W; 2825 m)

***Liolaemus ceii*** [sample 16] (MVZ 232291; GenBank Accession: **AY662073**);

ARGENTINA: Province Neuquén: Department Ñorquin: 1 km S and 3 km E

Termas de Copahue (1900 m)

***Liolaemus chaltin*** (SDSU 3572; GenBank Accession: **AY662061**); ARGENTINA:

Province Jujuy: Department Cochinoca: 4.2 km W Abra Pampa on Ruta Provincial

71 (22° 41' 24.4" S; 65° 43' 12.4" W; 3360 m)

***Liolaemus chiliensis*** (MIC 1256; GenBank Accession: **AY662070**); ARGENTINA:

Province Neuquén: Department Collon Cruz: 1 km N El Salitral on Ruta Nacional

40 (1050 m)

***Liolaemus cyanogaster*** (MIC 1242; GenBank Accession: **AY662071**); ARGENTINA:

Province Neuquén: Ñilque Costas, Puyehue

***Liolaemus dicktracyi*** (CM 147717; GenBank Accession: **AY662065**); ARGENTINA:

Province La Rioja: Department Famatina: Sierra de Famatina, Pozuelos Blancos,

26.5 km from Famatina on road to Cueva de Perez (28° 54' 30" S; 67° 41' 30" W;

2800 m)

***Liolaemus cf. elongatus*** [sample "Mendoza"] (SDSU 3460; GenBank Accession:

**AY662077**); ARGENTINA: Province Mendoza: Department Las Heras: 24 km NE

Uspallata (38° 28' 52.2" S; 69° 09' 59.2" W; 2768 m)

***Liolaemus cf. elongatus*** [sample 10] (SDSU 3697; GenBank Accession: **AY662079**);

ARGENTINA: Province Neuquén: Department Ñorquin: Barda W Copahue pueblo

***Liolaemus gracilis*** (SDSU 3408; GenBank Accession: **AY662068**); ARGENTINA:

Province Mendoza: Department San Rafael: SE beach of Embalse Nihuil (35° 02' 36.2" S; 68° 40' 42.2" W; 1380 m)

***Liolaemus heliodermis*** (FML 6006; GenBank Accession: **AY662064**); ARGENTINA:

Province Tucumán: Department Tañi del Valle: km 95, Ruta Provincial 307 (26° 40.82' S; 65° 48.74' W; 2820 m)

***Liolaemus kriegi*** (MVZ 232432; GenBank Accession: **AY662074**); ARGENTINA:

Province Neuquén: Department Los Lagos: 0.5 km S and 1.5 km W Cerro de las Ardillas (1600 m) [initial ID: *L. cf. buergeri*; MIC 1114]

***Liolaemus lemniscatus*** (MIC 1106; GenBank Accession: **AY662054**); ARGENTINA:

Province Neuquén: Department Los Lagos: 0.5 km S and 1.5 km W Cerro de las Ardillas (1575 m)

***Liolaemus pagaburoi*** (FML uncataloged; GenBank Accession: **AY662058**);

ARGENTINA: Province Tucumán: Department Tañi del Valle: km 95, Ruta Provincial 307 (26° 40.82' S; 65° 48.74' W; 2820 m)

***Liolaemus petrophilus*** (MLP.S 1671; GenBank Accession: **AY662078**); ARGENTINA:

Province Río Negro: Meseta Somuncurá

***Liolaemus puna*** (REE 219; GenBank Accession: **AY662059**); ARGENTINA: Province

Salta: Department Los Andes: km 111–112 on Ruta Nacional 51, ca. 4 km E Olacapato (24° 08' 21.3" S; 66° 42' 3.71" W; 4230 m)

***Liolaemus ramirezae*** (FML uncataloged; GenBank Accession: **AY662060**);

ARGENTINA: Province Tucumán: Department Tañi del Valle: km 95, Ruta Provincial 307 (26° 40.82' S; 65° 48.74' W; 2820 m)

***Liolaemus robertmertensi*** (SDSU 3499; GenBank Accession: **AY662066**);

ARGENTINA: Province Catamarca: Department Pomán: 6.6 km W Ruta Provincial 46, 33.1 km S Andalgalá, “Puesto Río Blanco” (27° 49' 39.4" S; 66° 14' 37.9" W; 690 m)

***Liolaemus tenuis*** (MIC 1205; GenBank Accession: **AY662055**); ARGENTINA:

Province Neuquén: Department Aluminé: Lago Ñorquico (1050 m)

***Liolaemus cf. thermanum*** (REE 132; GenBank Accession: **AY662076**); ARGENTINA:

Province Mendoza: Department Malargüe: Laguna Niña Encontrada (35° 09' 37.4" S; 69° 52' 09.0" W; 1680 m)

***Liolaemus cf. walkeri*** (SDSU 4018; GenBank Accession: **AY662057**); CHILE: Region

II: Volcán El Tatío (possibly “Geysir del Tatío” ca. 65 km N of San Pedro de Atacama)

***Liolaemus yanalco*** (FL, uncataloged; GenBank Accession: **AY662056**); ARGENTINA:

Province Salta: Department La Poma: road to Acay from Estación Muñano, 5–9 km S Ruta Nacional 51

***Phymaturus mallimaccii*** (REE 183; GenBank Accession: **AY662052**); ARGENTINA:

Province La Rioja: Department Famatina: Sierra de Famatina, ca. Cueva de Perez, Sierra de Famatina (29° 00' 30" S; 67° 43' 30" W; ca. 3600 m)

***Phymaturus palluma*** (SDSU 3388; GenBank Accession: **AY662050**); ARGENTINA:

Province Mendoza: Department Las Heras: 24 km NE Uspallata (38° 28' 52.4" S; 69° 11' 11.9" W; 2768 m)

*Phymaturus punae* (REE 271; GenBank Accession: **AY662053**); ARGENTINA:

Province La Rioja: Department Gral. Sarmiento: Reserva Laguna Brava, Agua

Quemada (28° 48' 11.3" S; 68° 45' 49.4" W; 3177 m)

*Phymaturus somuncurensis* (MLP.S 1646; GenBank Accession: **AY662051**);

ARGENTINA: Province Río Negro: Meseta de Somuncurá

## Previously Sequenced Taxa

| Taxon                                | GenBank       |      |
|--------------------------------------|---------------|------|
|                                      | accession no. | Ref. |
| <b>Outgroups</b>                     |               |      |
| <i>Leiocephalus carinatus</i>        | AF049864      | 40   |
| <i>Oplurus cuvieri</i>               | U82685        | 41   |
| <i>Phrynosoma hernandesi</i>         | U82686        | 41   |
| <i>Stenocercus crassicaudatus</i>    | AF049866      | 40   |
| <b>Liolaemidae</b>                   |               |      |
| <i>Ctenoblepharys adspersa</i>       | AF305784      | 42   |
| <i>Liolaemus abaucan</i>             | AF099263      | 43   |
| <i>Liolaemus albiceps</i>            | AF099267      | 43   |
| <i>Liolaemus andinus</i> —La Rioja   | AF099245      | 43   |
| <i>Liolaemus andinus</i> —Jujuy      | AF099251      | 43   |
| <i>Liolaemus austromendocinus</i>    | AF099239      | 43   |
| <i>Liolaemus bellii</i>              | AF099223      | 43   |
| <i>Liolaemus bibronii</i>            | AF099221      | 43   |
| <i>Liolaemus bitaeniatus</i>         | AF099219      | 43   |
| <i>Liolaemus boulengeri</i> —Mendoza | AF099275      | 43   |
| <i>Liolaemus buergeri</i>            | AF099236      | 43   |
| <i>Liolaemus capillitas</i>          | AF099234      | 43   |
| <i>Liolaemus ceii</i>                | AF099237      | 43   |

|                                               |          |    |
|-----------------------------------------------|----------|----|
| <i>Liolaemus chacoensis</i>                   | AF099270 | 43 |
| <i>Liolaemus [alticolor] chaltin</i>          | AF099218 | 43 |
| <i>Liolaemus chiliensis</i>                   | AF099224 | 43 |
| <i>Liolaemus coeruleus</i>                    | AF099217 | 43 |
| <i>Liolaemus cuyanus</i>                      | AF099252 | 43 |
| <i>Liolaemus cyanogaster</i>                  | AF099225 | 43 |
| <i>Liolaemus darwini</i> —La Rioja            | AF099274 | 43 |
| <i>Liolaemus dorbignyi</i>                    | AF099248 | 43 |
| <i>Liolaemus elongatus</i> —Mendoza           | AF099240 | 43 |
| <i>Liolaemus famatinae</i>                    | AF099246 | 43 |
| <i>Liolaemus fitzingerii</i>                  | AF099253 | 43 |
| <i>Liolaemus fuscus</i>                       | AF099232 | 43 |
| <i>Liolaemus gracilis</i>                     | AF099222 | 43 |
| <i>Liolaemus [darwini—Mendoza] grosseorum</i> | AF099272 | 43 |
| <i>Liolaemus irregularis</i>                  | AF099268 | 43 |
| <i>Liolaemus koslowskyi</i>                   | AF099264 | 43 |
| <i>Liolaemus laurenti</i>                     | AF099273 | 43 |
| <i>Liolaemus lemniscatus</i>                  | AF099229 | 43 |
| <i>Liolaemus leopardinus</i>                  | AF099235 | 43 |
| <i>Liolaemus lineomaculatus</i>               | AF099241 | 43 |
| <i>Liolaemus lutzae</i>                       | AF099255 | 43 |
| <i>Liolaemus magellanicus</i>                 | AF099243 | 43 |
| <i>Liolaemus melanops</i>                     | AF099261 | 43 |

|                                    |          |    |
|------------------------------------|----------|----|
| <i>Liolaemus monticola</i>         | AF099230 | 43 |
| <i>Liolaemus multicolor</i>        | AF099250 | 43 |
| <i>Liolaemus multimaculatus</i>    | AF099257 | 43 |
| <i>Liolaemus nigroviridis</i>      | AF099233 | 43 |
| <i>Liolaemus nitidus</i>           | AF099231 | 43 |
| <i>Liolaemus occipitalis</i>       | AF099256 | 43 |
| <i>Liolaemus olongasta</i>         | AF099271 | 43 |
| <i>Liolaemus orientalis</i>        | AF099247 | 43 |
| <i>Liolaemus ornatus</i>           | AF099266 | 43 |
| <i>Liolaemus petrophilus</i>       | AF099238 | 43 |
| <i>Liolaemus pictus</i> —Neuquén   | AF099226 | 43 |
| <i>Liolaemus pictus</i> —Río Negro | LTU82684 | 43 |
| <i>Liolaemus poecilochromus</i>    | AF099249 | 43 |
| <i>Liolaemus pseudoanomalus</i>    | AF099254 | 43 |
| <i>Liolaemus quilmes</i>           | AF099265 | 43 |
| <i>Liolaemus robertmertensi</i>    | AF099220 | 43 |
| <i>Liolaemus rothi</i>             | AF099262 | 43 |
| <i>Liolaemus ruibali</i>           | AF099244 | 43 |
| <i>Liolaemus salinicola</i>        | AF099259 | 43 |
| <i>Liolaemus scapularis</i>        | AF099258 | 43 |
| <i>Liolaemus somuncurae</i>        | AF099242 | 43 |
| <i>Liolaemus tenuis</i>            | AF099228 | 43 |
| <i>Liolaemus uspallatensis</i>     | AF099269 | 43 |

|                                 |          |    |
|---------------------------------|----------|----|
| <i>Liolaemus wiegmanni</i>      | AF099260 | 43 |
| <i>Liolaemus zapallarensis</i>  | AF099227 | 43 |
| <i>Phymaturus palluma</i>       | AF099216 | 43 |
| <i>Phymaturus somuncurensis</i> | AF049685 | 40 |

---
